# Supplementary material for: Deficits in systemic biomarkers of neuroinflammation and growth factors promoting nerve regeneration in patients with type 2 diabetes and polyneuropathy
Source: PubMed Central journal article supplement — BMJ Open Diabetes Res Care. 2019 Nov 27;7(1):e000752. doi: 10.1136/bmjdrc-2019-000752 (PMC6887496; doi:10.1136/bmjdrc-2019-000752), 2019-11-27
Supplement: bmjdrc-2019-000752supp001.pdf [file bmjdrc-2019-000752supp001.pdf]

**Supplementary Table 1.** Normalized protein expression levels for all 71 detectable biomarkers of the subclinical inflammation panel.

| Biomarkers | NGT<br>(n=354) | DSPN-<br>(n=158)          | DSPN+<br>(n=304)            | P value*                      |
|------------|----------------|---------------------------|-----------------------------|-------------------------------|
| CSF1       | 7.77 ± 0.22    | 7.80 ± 0.28               | 7.76 ± 0.30                 | 0.097                         |
| IL6        | 2.26 ± 0.80    | 2.58 ± 0.73 <sup>1</sup>  | 2.57 ± 0.83 <sup>1</sup>    | <b>1.4 × 10<sup>-13</sup></b> |
| IL7        | 4.64 ± 0.48    | 4.67 ± 0.50               | 4.56 ± 0.59                 | 0.164                         |
| IL8        | 6.72 ± 0.62    | 6.82 ± 0.50               | 6.39 ± 0.76 <sup>1,2</sup>  | <b>1.4 × 10<sup>-4</sup></b>  |
| IL10       | 2.45 ± 0.45    | 2.52 ± 0.43               | 2.58 ± 0.57                 | 0.00029                       |
| IL17C      | 1.43 ± 0.62    | 1.50 ± 0.54               | 1.32 ± 0.56                 | 0.00032                       |
| IL12B      | 5.40 ± 0.64    | 5.47 ± 0.75               | 5.54 ± 0.78                 | 0.029                         |
| IL18       | 8.67 ± 0.58    | 8.86 ± 0.65 <sup>1</sup>  | 8.82 ± 0.60 <sup>1</sup>    | <b>7.0 × 10<sup>-6</sup></b>  |
| OSM        | 4.83 ± 0.62    | 5.06 ± 0.63 <sup>1</sup>  | 4.35 ± 0.75 <sup>1,2</sup>  | <b>4.9 × 10<sup>-25</sup></b> |
| SCF        | 9.96 ± 0.34    | 9.80 ± 0.47 <sup>1</sup>  | 9.75 ± 0.50 <sup>1</sup>    | <b>3.0 × 10<sup>-8</sup></b>  |
| TNFB       | 3.87 ± 0.46    | 3.83 ± 0.50               | 3.80 ± 0.50                 | 0.205                         |
| TNFSF14    | 5.61 ± 0.52    | 5.65 ± 0.55               | 4.90 ± 0.77 <sup>1,2</sup>  | <b>2.2 × 10<sup>-40</sup></b> |
| TRAIL      | 8.12 ± 0.30    | 8.08 ± 0.33               | 7.90 ± 0.41 <sup>1,2</sup>  | <b>8.6 × 10<sup>-16</sup></b> |
| TRANCE     | 4.61 ± 0.63    | 4.54 ± 0.58               | 4.46 ± 0.64                 | 0.006                         |
| TWEAK      | 9.44 ± 0.29    | 9.30 ± 0.32 <sup>1</sup>  | 9.06 ± 0.35 <sup>1,2</sup>  | <b>1.1 × 10<sup>-44</sup></b> |
| MCP-1      | 11.11 ± 0.39   | 11.14 ± 0.42              | 11.02 ± 0.57                | 0.004                         |
| MIP-1α     | 4.44 ± 0.51    | 4.65 ± 0.65 <sup>1</sup>  | 4.54 ± 0.57 <sup>1,2</sup>  | <b>0.00021</b>                |
| CCL4       | 8.18 ± 0.57    | 8.36 ± 0.64 <sup>1</sup>  | 7.93 ± 0.68 <sup>1,2</sup>  | <b>8.4 × 10<sup>-14</sup></b> |
| MCP-3      | 1.87 ± 0.51    | 2.11 ± 0.75 <sup>1</sup>  | 1.77 ± 0.58 <sup>1,2</sup>  | <b>1.8 × 10<sup>-7</sup></b>  |
| MCP-2      | 9.50 ± 0.77    | 9.47 ± 0.72               | 9.21 ± 0.77 <sup>1,2</sup>  | <b>3.0 × 10<sup>-8</sup></b>  |
| MCP-4      | 4.03 ± 0.57    | 4.13 ± 0.56               | 3.99 ± 0.71                 | 0.103                         |
| CCL11      | 8.69 ± 0.40    | 8.79 ± 0.41               | 8.74 ± 0.44                 | 0.037                         |
| CCL19      | 9.80 ± 0.92    | 10.06 ± 0.87 <sup>1</sup> | 10.29 ± 0.95 <sup>1,2</sup> | <b>9.7 × 10<sup>-13</sup></b> |
| CCL20      | 4.91 ± 1.18    | 5.24 ± 1.11 <sup>1</sup>  | 5.79 ± 1.23 <sup>1,2</sup>  | <b>5.0 × 10<sup>-25</sup></b> |
| CCL23      | 9.98 ± 0.47    | 10.02 ± 0.49              | 10.15 ± 0.48 <sup>1,2</sup> | <b>1.9 × 10<sup>-4</sup></b>  |
| CCL25      | 6.63 ± 0.58    | 6.71 ± 0.54               | 6.89 ± 0.60 <sup>1,2</sup>  | <b>2.1 × 10<sup>-7</sup></b>  |
| CCL28      | 1.56 ± 0.38    | 1.57 ± 0.44               | 1.29 ± 0.34 <sup>1,2</sup>  | <b>2.4 × 10<sup>-21</sup></b> |
| CXCL1      | 9.42 ± 0.48    | 9.49 ± 0.47               | 9.27 ± 0.65 <sup>1,2</sup>  | <b>3.3 × 10<sup>-5</sup></b>  |
| CXCL5      | 11.63 ± 0.72   | 11.58 ± 0.75              | 11.40 ± 0.89                | 0.002                         |
| CXCL6      | 8.69 ± 0.59    | 8.82 ± 0.50               | 8.82 ± 0.68                 | 0.001                         |
| CXCL9      | 7.46 ± 0.79    | 7.54 ± 0.77               | 7.55 ± 0.88                 | 0.177                         |
| CXCL10     | 9.41 ± 0.84    | 9.57 ± 0.83               | 9.49 ± 0.93                 | 0.010                         |
| CXCL11     | 7.89 ± 0.78    | 7.99 ± 0.61 <sup>1</sup>  | 7.46 ± 0.78 <sup>1,2</sup>  | <b>6.4 × 10<sup>-18</sup></b> |
| CX3CL1     | 6.26 ± 0.39    | 6.23 ± 0.48               | 6.26 ± 0.44                 | 0.619                         |
| βNGF       | 1.85 ± 0.33    | 1.92 ± 0.40               | 1.93 ± 0.40                 | 0.005                         |
| FGF5       | 1.27 ± 0.27    | 1.26 ± 0.33               | 1.24 ± 0.33                 | 0.270                         |

|    |                  |              |                           |                             |                               |
|----|------------------|--------------|---------------------------|-----------------------------|-------------------------------|
| 1  |                  |              |                           |                             |                               |
| 2  |                  |              |                           |                             |                               |
| 3  |                  |              |                           |                             |                               |
| 4  |                  |              |                           |                             |                               |
| 5  |                  |              |                           |                             |                               |
| 6  |                  |              |                           |                             |                               |
| 7  |                  |              |                           |                             |                               |
| 8  |                  |              |                           |                             |                               |
| 9  |                  |              |                           |                             |                               |
| 10 |                  |              |                           |                             |                               |
| 11 |                  |              |                           |                             |                               |
| 12 |                  |              |                           |                             |                               |
| 13 |                  |              |                           |                             |                               |
| 14 |                  |              |                           |                             |                               |
| 15 |                  |              |                           |                             |                               |
| 16 |                  |              |                           |                             |                               |
| 17 |                  |              |                           |                             |                               |
| 18 |                  |              |                           |                             |                               |
| 19 |                  |              |                           |                             |                               |
| 20 |                  |              |                           |                             |                               |
| 21 |                  |              |                           |                             |                               |
| 22 |                  |              |                           |                             |                               |
| 23 |                  |              |                           |                             |                               |
| 24 |                  |              |                           |                             |                               |
| 25 |                  |              |                           |                             |                               |
| 26 |                  |              |                           |                             |                               |
| 27 |                  |              |                           |                             |                               |
| 28 |                  |              |                           |                             |                               |
| 29 |                  |              |                           |                             |                               |
| 30 |                  |              |                           |                             |                               |
| 31 |                  |              |                           |                             |                               |
| 32 |                  |              |                           |                             |                               |
| 33 |                  |              |                           |                             |                               |
| 34 |                  |              |                           |                             |                               |
| 35 |                  |              |                           |                             |                               |
| 36 |                  |              |                           |                             |                               |
| 37 |                  |              |                           |                             |                               |
| 38 |                  |              |                           |                             |                               |
| 39 |                  |              |                           |                             |                               |
| 40 |                  |              |                           |                             |                               |
| 41 |                  |              |                           |                             |                               |
| 42 |                  |              |                           |                             |                               |
| 43 |                  |              |                           |                             |                               |
| 44 |                  |              |                           |                             |                               |
| 45 |                  |              |                           |                             |                               |
| 46 |                  |              |                           |                             |                               |
| 47 |                  |              |                           |                             |                               |
| 48 |                  |              |                           |                             |                               |
| 49 |                  |              |                           |                             |                               |
| 50 |                  |              |                           |                             |                               |
| 51 |                  |              |                           |                             |                               |
| 52 |                  |              |                           |                             |                               |
| 53 |                  |              |                           |                             |                               |
| 54 |                  |              |                           |                             |                               |
| 55 |                  |              |                           |                             |                               |
| 56 |                  |              |                           |                             |                               |
| 57 |                  |              |                           |                             |                               |
| 58 |                  |              |                           |                             |                               |
| 59 |                  |              |                           |                             |                               |
| 60 |                  |              |                           |                             |                               |
|    | <b>FGF19</b>     | 7.88 ± 0.88  | 7.60 ± 0.93 <sup>1</sup>  | 7.58 ± 0.97 <sup>1</sup>    | <b>5.4 × 10<sup>-5</sup></b>  |
|    | <b>FGF21</b>     | 5.69 ± 1.05  | 6.41 ± 1.11 <sup>1</sup>  | 6.25 ± 1.40 <sup>1</sup>    | <b>2.4 × 10<sup>-13</sup></b> |
|    | <b>FGF23</b>     | 1.42 ± 0.48  | 1.64 ± 0.97 <sup>1</sup>  | 1.37 ± 0.70 <sup>1,2</sup>  | <b>5.8 × 10<sup>-5</sup></b>  |
|    | <b>HGF</b>       | 8.54 ± 0.36  | 8.79 ± 0.40 <sup>1</sup>  | 8.42 ± 0.41 <sup>1,2</sup>  | <b>2.3 × 10<sup>-18</sup></b> |
|    | <b>TGFα</b>      | 4.54 ± 0.52  | 4.63 ± 0.56 <sup>1</sup>  | 3.91 ± 0.51 <sup>1,2</sup>  | <b>3.6 × 10<sup>-49</sup></b> |
|    | <b>VEGF-A</b>    | 10.88 ± 0.51 | 10.99 ± 0.48 <sup>1</sup> | 10.76 ± 0.56 <sup>1,2</sup> | <b>3.3 × 10<sup>-5</sup></b>  |
|    | <b>CD40</b>      | 10.26 ± 0.33 | 10.30 ± 0.43              | 10.15 ± 0.46 <sup>1,2</sup> | <b>5.1 × 10<sup>-7</sup></b>  |
|    | <b>CD244</b>     | 5.55 ± 0.33  | 5.58 ± 0.40               | 5.55 ± 0.41                 | 0.440                         |
|    | <b>DNER</b>      | 8.33 ± 0.23  | 8.28 ± 0.26 <sup>1</sup>  | 8.14 ± 0.30 <sup>1,2</sup>  | <b>1.5 × 10<sup>-17</sup></b> |
|    | <b>GDNF</b>      | 1.09 ± 0.31  | 1.21 ± 0.33 <sup>1</sup>  | 1.14 ± 0.34                 | <b>3.9 × 10<sup>-5</sup></b>  |
|    | <b>IL10RB</b>    | 7.22 ± 0.30  | 7.29 ± 0.39               | 7.30 ± 0.37                 | 0.002                         |
|    | <b>IL15RA</b>    | 0.77 ± 0.31  | 0.83 ± 0.35               | 0.79 ± 0.33                 | 0.152                         |
|    | <b>IL18R1</b>    | 7.39 ± 0.38  | 7.68 ± 0.43 <sup>1</sup>  | 7.69 ± 0.53 <sup>1</sup>    | <b>1.2 × 10<sup>-19</sup></b> |
|    | <b>LAP TGFβ1</b> | 7.90 ± 0.50  | 7.99 ± 0.33 <sup>1</sup>  | 7.46 ± 0.40 <sup>1,2</sup>  | <b>2.6 × 10<sup>-52</sup></b> |
|    | <b>LIF-R</b>     | 4.60 ± 0.29  | 4.73 ± 0.35 <sup>1</sup>  | 4.72 ± 0.38 <sup>1</sup>    | <b>5.7 × 10<sup>-8</sup></b>  |
|    | <b>NT3</b>       | 1.05 ± 0.41  | 1.00 ± 0.33               | 0.87 ± 0.40 <sup>1,2</sup>  | <b>6.4 × 10<sup>-13</sup></b> |
|    | <b>OPG</b>       | 10.19 ± 0.33 | 10.31 ± 0.36 <sup>1</sup> | 10.29 ± 0.39 <sup>1</sup>   | <b>1.1 × 10<sup>-5</sup></b>  |
|    | <b>TNFRSF9</b>   | 6.32 ± 0.50  | 6.36 ± 0.57               | 6.41 ± 0.59                 | 0.056                         |
|    | <b>4E_BP1</b>    | 6.86 ± 0.58  | 7.10 ± 0.64 <sup>1</sup>  | 7.03 ± 1.19 <sup>1</sup>    | <b>9.8 × 10<sup>-8</sup></b>  |
|    | <b>ADA</b>       | 3.82 ± 0.38  | 3.79 ± 0.39               | 3.80 ± 0.37                 | 0.954                         |
|    | <b>AXIN1</b>     | 1.57 ± 0.49  | 1.61 ± 0.54               | 1.34 ± 0.48 <sup>1,2</sup>  | <b>5.7 × 10<sup>-12</sup></b> |
|    | <b>CD5</b>       | 5.36 ± 0.42  | 5.42 ± 0.44               | 5.45 ± 0.45                 | 0.017                         |
|    | <b>CD6</b>       | 4.62 ± 0.52  | 4.62 ± 0.53               | 4.62 ± 0.54                 | 0.684                         |
|    | <b>CDCP1</b>     | 3.32 ± 0.67  | 3.53 ± 0.67 <sup>1</sup>  | 3.36 ± 0.63 <sup>1,2</sup>  | <b>5.3 × 10<sup>-5</sup></b>  |
|    | <b>CST5</b>      | 6.45 ± 0.47  | 6.43 ± 0.56               | 6.40 ± 0.55                 | 0.419                         |
|    | <b>EN_RAGE</b>   | 4.99 ± 0.80  | 5.16 ± 0.82               | 5.19 ± 1.03                 | 0.006                         |
|    | <b>Fit3L</b>     | 8.89 ± 0.40  | 9.00 ± 0.52               | 8.97 ± 0.43                 | 0.002                         |
|    | <b>MMP-1</b>     | 14.43 ± 0.78 | 14.44 ± 0.74              | 14.06 ± 0.92 <sup>1,2</sup> | <b>2.7 × 10<sup>-8</sup></b>  |
|    | <b>MMP-10</b>    | 6.42 ± 0.58  | 6.51 ± 0.66               | 6.61 ± 0.62 <sup>1,2</sup>  | <b>6.9 × 10<sup>-5</sup></b>  |
|    | <b>PD-L1</b>     | 4.28 ± 0.48  | 4.36 ± 0.49               | 4.29 ± 0.49                 | 0.092                         |
|    | <b>SIRT2</b>     | 2.31 ± 0.50  | 2.37 ± 0.53               | 2.54 ± 0.69 <sup>1,2</sup>  | <b>4.05 × 10<sup>-7</sup></b> |
|    | <b>SLAMF1</b>    | 2.44 ± 0.50  | 2.73 ± 0.60 <sup>1</sup>  | 2.74 ± 0.58 <sup>1</sup>    | <b>1.2 × 10<sup>-17</sup></b> |
|    | <b>ST1A1</b>     | 2.07 ± 0.84  | 1.99 ± 0.78               | 1.78 ± 0.84 <sup>1,2</sup>  | <b>3.0 × 10<sup>-6</sup></b>  |
|    | <b>STAMPB</b>    | 3.04 ± 0.35  | 3.05 ± 0.40               | 3.06 ± 0.49                 | 0.974                         |
|    | <b>uPA</b>       | 9.91 ± 0.28  | 9.86 ± 0.33               | 9.80 ± 0.36 <sup>1,2</sup>  | <b>8.9 × 10<sup>-5</sup></b>  |

Data are expressed as mean±SD (the unit is normalized protein expression (NPX) which is comparable in its distribution to log2-transformed protein concentration)

\* - Kruskal-Wallis test (**bold** – significant after Bonferroni correction [ $P < 0.000235 \times 10^{-4}$ ])  
Mann-Whitney U test: <sup>1</sup> $P < 0.05$  vs NGT group; <sup>2</sup> $P < 0.05$  vs DSPN- group.
